# Supplementary material
Source: publisher figshare collection journal article supplement (https://acs.figshare.com/ndownloader/files/4145497)
Supplement: Supplementary file 1 [file 4145497]

---

## Supplementary Information

### Self-assembly of Supra-Amphiphiles based on Dual Charge-transfer

#### Interactions: from Nanosheets to Nanofibers

*Kai Liu,<sup>a</sup> Yuxing Yao,<sup>a</sup> Yu Liu,<sup>b</sup> Chao Wang,<sup>a</sup> Zhibo Li,<sup>b</sup> and Xi Zhang<sup>\*a</sup>*

<sup>a</sup> Key Lab of Organic Optoelectronics & Molecular Engineering, Department of Chemistry, Tsinghua University, Beijing 100084 ,China

<sup>b</sup> Institute of Chemistry, Chinese Academy of Sciences, Beijing 100190, China.

---

1. BNDIV self-assembles into small nanosheets, whereas BNAPHV self-assembles into micelles, as shown in Figure S1.

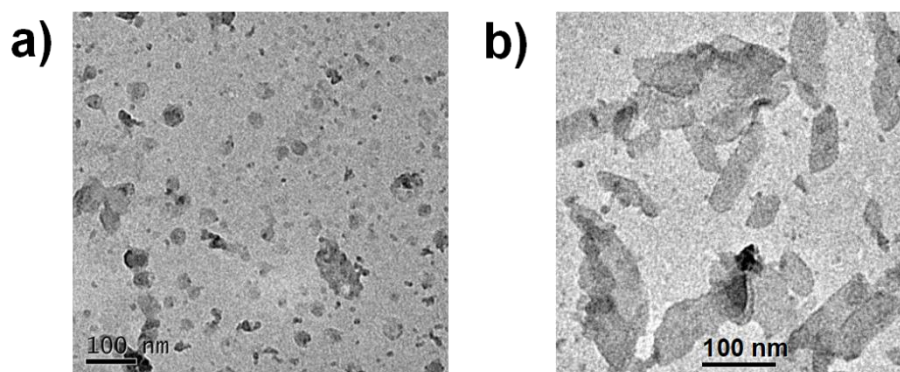

Figure S1. TEM images of a) BNAPHV and b) BNDIV assemblies.

2. We have compared the fluorescence spectrum of BNDIV/(PYR)<sub>2</sub>, BNAPHV/(PYR)<sub>2</sub> and BNDIV/BNAPHV/(PYR)<sub>4</sub>, where the concentration of PYR is fixed. As shown in Figure S2, the emission of PYR in BNDIV/BNAPHV/(PYR)<sub>4</sub> dual charge-transfer complex is lower than that in the single charge-transfer complexes, i.e. BNDIV/(PYR)<sub>2</sub> or BNAPHV/(PYR)<sub>2</sub>. In other words, the quenching extent is enlarged in the ternary systems, indicating a stronger intermolecular interaction in the dual charge-transfer complexes. It should arise from the cooperativity between the dual charge-transfer interactions.

In our understanding, upon the addition of PYR, the pre-formed

---

“H-shape supra-amphiphile” maybe deformed, e.g. rotated, by the strong interaction of terminal viologen units with PYR. As a result, the PYR molecules don’t have to intercalate between the viologen units on the neighboring bola-amphiphiles. Otherwise, the packing of the NDI and NAPH hydrophobic aromatic rings will be loose, which is unfavorable in water.

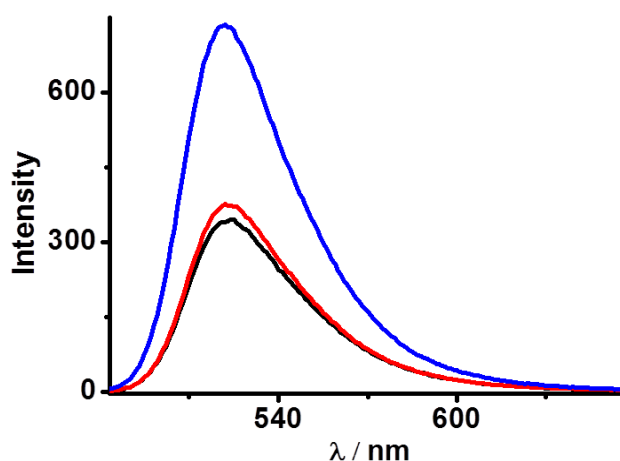

Figure S2. Fluorescence spectrum of the BNDIV/(PYR)<sub>2</sub> (blue curve), BNAPHV/(PYR)<sub>2</sub> (red curve) and BNDIV/BNAPHV/(PYR)<sub>4</sub> (black curve) complex solutions.

3. The distribution of the width of ultra-long nanofibers. Please refer to line 10 on page 12 in the maintext and Figure S3 in the supporting information. The nanofibers are quite uniform with a diameter of about 4.6 nm.

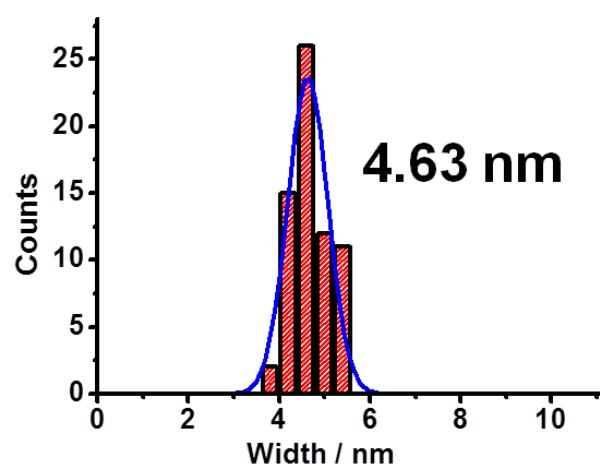

Figure S3 Distributions of the width of the BNDIV-BNAPHV/(PYR)<sub>4</sub> nanofibers.
